# Supplementary material for: Salvianolic acid A as a multifunctional agent ameliorates doxorubicin-induced nephropathy in rats
Source: PubMed Central journal article supplement (PMC4508635; doi:10.1038/srep12273), 2015-07-21
Supplement: srep12273-s1.pdf [file srep12273-s1.pdf]

# **Supplementary Data**

**Title: Salvianolic acid A as a multifunctional agent ameliorates  
doxorubicin-induced nephropathy in rats**

Authors: Hua-Ying Fan, Ming-Yan Yang, Dong Qi, Zuo-Kai Zhang, Lin Zhu, Xiu-Xin

Shang-Guan, Ke Liu, Hui Xu, Xin Che

Figure 5 a

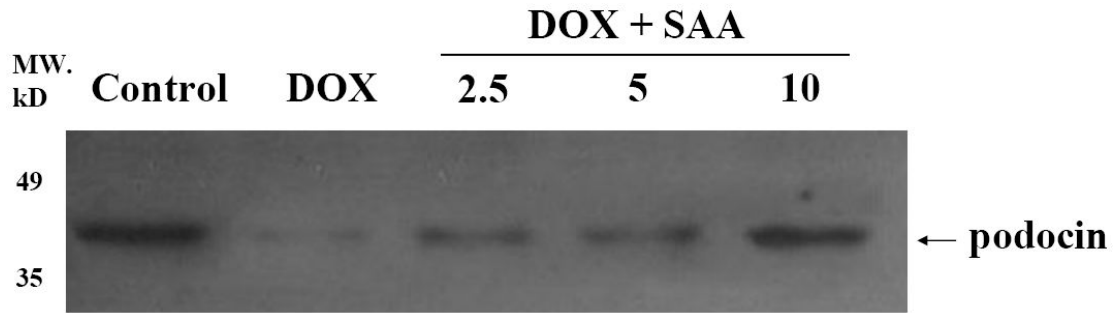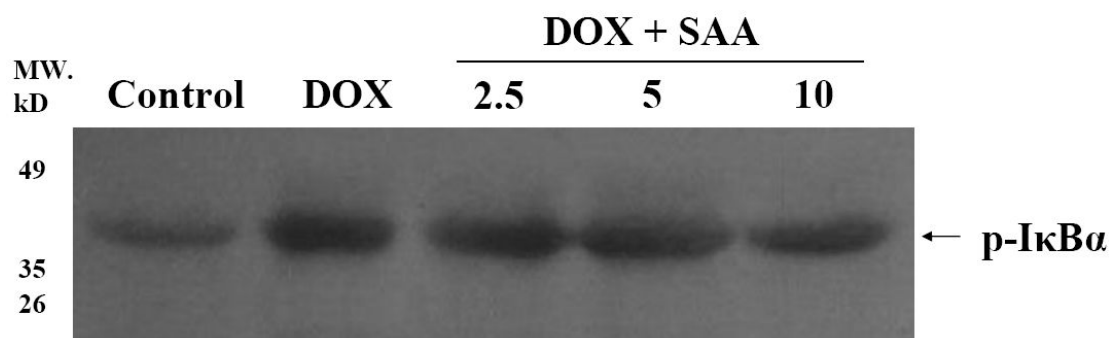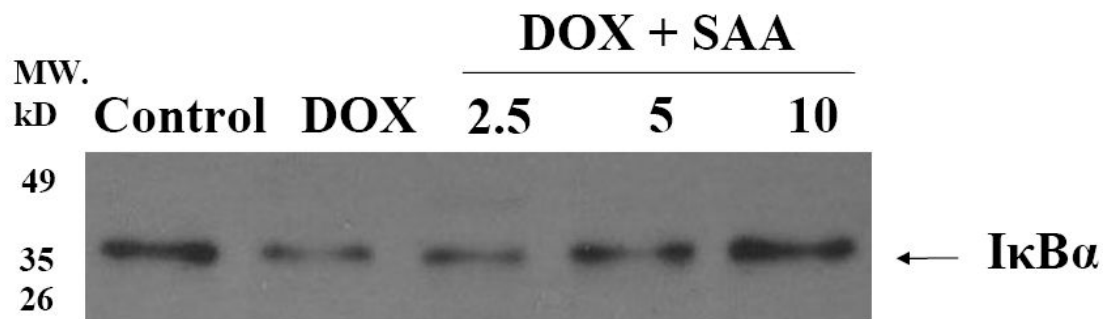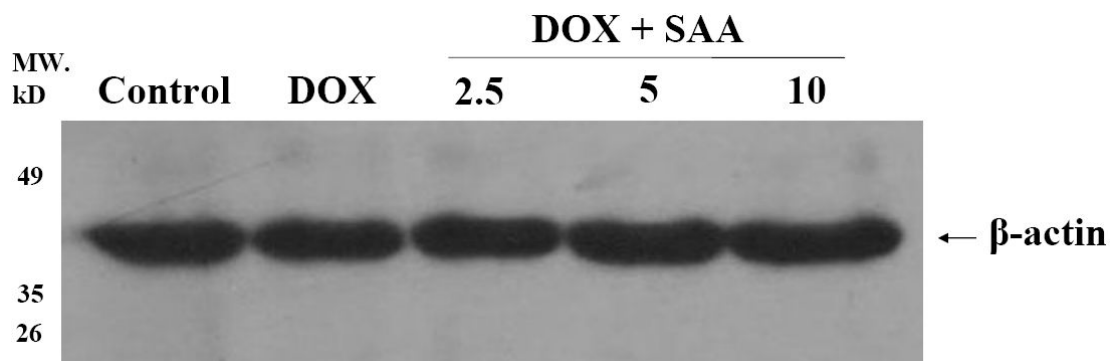

Figure 5 b

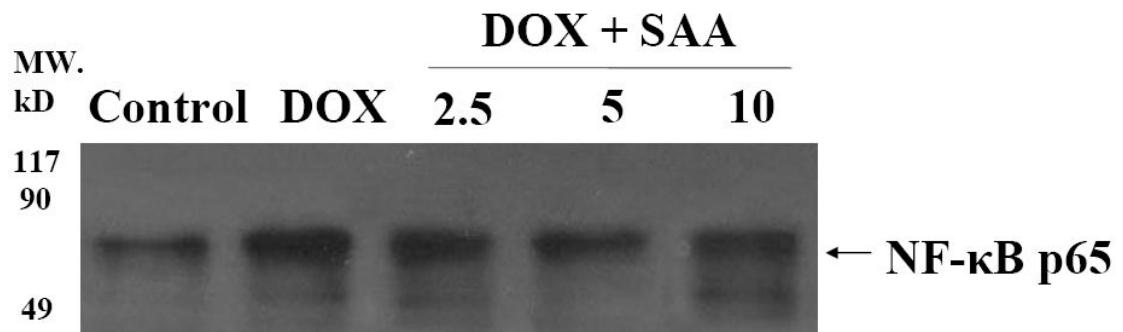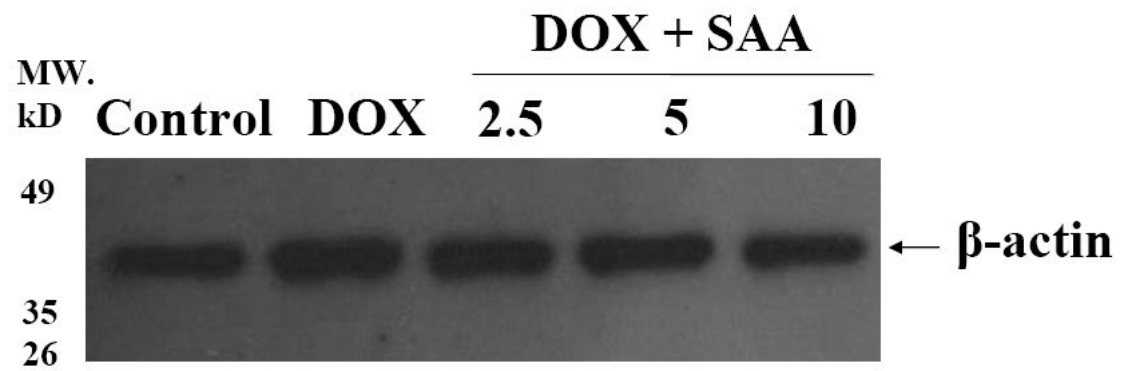

Figure Legend

Figure 5. The effect of SAA on podocin, p-IκBα, IκBα and NF-κB p65 protein expressions. a and b: Protein bands. Abbreviations: SAA, Salvianolic acid A; DOX, Doxorubicin.
